# Supplementary material for: Combinatorial G x G x E CRISPR screening and functional analysis highlights SLC25A39 in mitochondrial GSH transport
Source: Research Square preprint supplement (doi:10.21203/rs.3.rs-955541/v1), 2021-10-06
Supplement: Supplementary file 1 [file 44bb8acb5cf70b0d9a77ec07.xlsx]

## Sheet: Summary
Supplementary Table 4: Summary of all gene x gene x environment interactions
table_data_raw: Raw pi-score values for the gxgxe hits shown in Fig. 3a
table_data_zscore: The z-score normalized pi-scores for the gxgxe hits shown in Fig. 3a
All_Data_Sig_0.02: All significant pi-score interactions are shown for each conditions
SLC25_family_only_sig_0.02: Subsetted to only SLC25 family members, and reasoning for exclusion or filtering are given

## Sheet: table_data_raw
	Glc15	Gal15	Anti15	Pyr15
SLC25A5+SLC25A6	0.285945	-0.619645	-0.370451	0.0834685
MTCH1+MTCH2	-0.233478	-0.378515	-0.444083	-0.280116
SLC25A28+SLC25A37	-0.286856	-0.244854	-0.236771	-0.308143
SLC25A16+SLC25A42	-0.345241	-0.263305	-0.075631	-0.288869
SLC25A37+SLC25A39	0.200869	0.116537	0.317154	0.243095
SLC25A11+SLC25A19	-0.0446811	0.00116318	-0.284512	-0.0829694
MTCH2+SLC25A20	-0.168343	-0.0708754	-0.305442	-0.161735
SLC25A1+SLC25A36	-0.302355	-0.101443	0.0296765	-0.232504
MTCH2+SLC25A36	-0.37848	-0.0559601	-0.0282673	-0.20926
BCL2L1+MCL1	-0.550891	-0.190653	-0.426296	-0.538181
UCP1+SLC25A31	-0.00404245	0.0183709	0.0688827	0.000215922

## Sheet: table_data_zscore
	Glc15	Gal15	Anti15	Pyr15
SLC25A5+SLC25A6	3.72536	-12.2868	-4.95939	1.17971
MTCH1+MTCH2	-3.04262	-7.51525	-5.94553	-3.92348
SLC25A28+SLC25A37	-3.73813	-4.87029	-3.16906	-4.31685
SLC25A16+SLC25A42	-4.49888	-5.2354	-1.01095	-4.04632
SLC25A37+SLC25A39	2.61683	2.2811	4.24951	3.42019
SLC25A11+SLC25A19	-0.58264	-0.00198286	-3.80844	-1.15637
MTCH2+SLC25A20	-2.19393	-1.42752	-4.08874	-2.26191
SLC25A1+SLC25A36	-3.94007	-2.0324	0.399406	-3.2552
MTCH2+SLC25A36	-4.93197	-1.13237	-0.376619	-2.92896
BCL2L1+MCL1	-7.17846	-3.79775	-5.70732	-7.54562
UCP1+SLC25A31	-0.0531264	0.338533	0.924484	0.0111964

## Sheet: All_Data_Sig_0.02
X1	X2	sig	pi	comb	cond	pi			Gene+Gene	Glc	Gal	Pyr	Anti	Direction	sko_A	sko_B	Paralogs
SLC25A36	SLC25A25	4.87502e-06	-0.481218	SLC25A36+SLC25A25	Glc	-0.481218			MTCH2+MTCH1		Gal		Anti	-	-1.24527	-0.186927
SLC25A6	SLC25A5	5.40284e-06	0.285945	SLC25A6+SLC25A5	Glc	0.285945			MTCH2+SLC25A1	Glc		Pyr		+	-1.24527	-1.40094
SLC25A36	SLC25A33	1.77682e-05	-0.383594	SLC25A36+SLC25A33	Glc	-0.383594			MTCH2+SLC25A19	Glc		Pyr		+	-1.24527	-0.784617
SLC25A37	SLC25A28	3.7605e-05	-0.286856	SLC25A37+SLC25A28	Glc	-0.286856			MTCH2+SLC25A2	Glc				-	-1.24527	0.0329448
SLC25A36	SLC25A1	7.51806e-05	-0.302355	SLC25A36+SLC25A1	Glc	-0.302355			MTCH2+SLC25A20				Anti	-	-1.24527	0.0684099
MTCH2	SLC25A1	0.000419355	0.317242	MTCH2+SLC25A1	Glc	0.317242			MTCH2+SLC25A36	Glc		Pyr		-	-1.24527	1.13272
SLC25A42	SLC25A16	0.000452703	-0.345241	SLC25A42+SLC25A16	Glc	-0.345241			SLC25A19+SLC25A11				Anti	-	-0.784617	-0.0796298
MTCH2	SLC25A19	0.00053875	0.24407	MTCH2+SLC25A19	Glc	0.24407			SLC25A30+SLC25A14		Gal			-	-0.0195455	0.0118894
SLC16A1	SLC25A1	0.000851193	0.333922	SLC16A1+SLC25A1	Glc	0.333922			SLC25A31+SLC25A11				Anti	+	0.0291329	-0.0796298
SLC30A9	SLC16A1	0.000966571	0.377388	SLC30A9+SLC16A1	Glc	0.377388			SLC25A32+SLC25A26				Anti	+	-0.799792	-1.00782
MTCH2	SLC25A36	0.00139707	-0.37848	MTCH2+SLC25A36	Glc	-0.37848			SLC25A33+SLC25A13	Glc				+	0.793659	-0.195332
SLC30A9	SLC25A1	0.00148421	0.246913	SLC30A9+SLC25A1	Glc	0.246913			SLC25A36+SLC25A1	Glc		Pyr		-	1.13272	-1.40094
EEF2	SLC25A1	0.00277652	0.349338	EEF2+SLC25A1	Glc	0.349338			SLC25A36+SLC25A19			Pyr	Anti	+/-	1.13272	-0.784617
MTCH2	SLC25A2	0.00291879	-0.225825	MTCH2+SLC25A2	Glc	-0.225825			SLC25A36+SLC25A20			Pyr		-	1.13272	0.0684099
SLC16A1	SLC25A40	0.00327196	-0.206847	SLC16A1+SLC25A40	Glc	-0.206847			SLC25A36+SLC25A25	Glc	Gal	Pyr	Anti	-	1.13272	0.563824
EEF2	SLC30A9	0.0035373	0.435764	EEF2+SLC30A9	Glc	0.435764			SLC25A36+SLC25A3	Glc				-	1.13272	-0.464295
EEF2	SLC25A33	0.00467567	-0.339177	EEF2+SLC25A33	Glc	-0.339177			SLC25A36+SLC25A33	Glc	Gal	Pyr	Anti	-	1.13272	0.793659
SLC25A43	SLC25A1	0.00891718	-0.105976	SLC25A43+SLC25A1	Glc	-0.105976			SLC25A36+SLC25A35				Anti	-	1.13272	-0.0397251
SLC30A9	SLC25A36	0.00891718	0.252479	SLC30A9+SLC25A36	Glc	0.252479			SLC25A37+SLC25A28	Glc	Gal	Pyr	Anti	-	-0.0909752	0.0546488
SLC30A9	SLC25A32	0.0125737	0.217776	SLC30A9+SLC25A32	Glc	0.217776			SLC25A39+SLC25A37			Pyr	Anti	+	-0.312558	-0.0909752
SLC25A33	SLC25A13	0.0146092	0.164753	SLC25A33+SLC25A13	Glc	0.164753			SLC25A42+SLC25A16	Glc	Gal	Pyr		-	-0.372192	-0.420052
SLC25A36	SLC25A3	0.0150154	-0.157384	SLC25A36+SLC25A3	Glc	-0.157384			SLC25A43+SLC25A1	Glc		Pyr		-	0.104152	-1.40094
MCL1	BCL2L1	0.0180951	-0.550891	MCL1+BCL2L1	Glc	-0.550891			SLC25A45+SLC25A13			Pyr		-	-0.417943	-0.195332
SLC16A11	SLC25A39	0.018503	0.154315	SLC16A11+SLC25A39	Glc	0.154315			SLC25A6+SLC25A5	Glc	Gal		Anti	+	0.264721	0.226811
SLC16A1	SLC25A26	0.0188095	0.297534	SLC16A1+SLC25A26	Glc	0.297534
MTCH2	MTCH1	2.75031e-09	-0.378515	MTCH2+MTCH1	Gal	-0.378515
SLC25A6	SLC25A5	2.34109e-08	-0.619645	SLC25A6+SLC25A5	Gal	-0.619645
SLC25A42	SLC25A16	0.000226915	-0.263305	SLC25A42+SLC25A16	Gal	-0.263305
SLC25A36	SLC25A25	0.000398952	-0.130968	SLC25A36+SLC25A25	Gal	-0.130968
SLC25A37	SLC25A28	0.000398952	-0.244854	SLC25A37+SLC25A28	Gal	-0.244854
BCL2L1	SLC30A9	0.0118103	0.249501	BCL2L1+SLC30A9	Gal	0.249501
EEF2	SLC25A1	0.0160479	0.297025	EEF2+SLC25A1	Gal	0.297025
SLC25A36	SLC25A33	0.0160479	-0.0888402	SLC25A36+SLC25A33	Gal	-0.0888402
BCL2L1	SLC25A1	0.0188464	0.289989	BCL2L1+SLC25A1	Gal	0.289989
SLC25A30	SLC25A14	0.0188464	-0.121436	SLC25A30+SLC25A14	Gal	-0.121436
SLC25A36	SLC25A33	2.81885e-07	-0.44666	SLC25A36+SLC25A33	Pyr	-0.44666
SLC25A36	SLC25A25	7.19338e-05	-0.268093	SLC25A36+SLC25A25	Pyr	-0.268093
SLC16A1	SLC25A1	0.000192458	0.336108	SLC16A1+SLC25A1	Pyr	0.336108
SLC25A42	SLC25A16	0.00131623	-0.288869	SLC25A42+SLC25A16	Pyr	-0.288869
SLC25A36	SLC25A1	0.00168087	-0.232504	SLC25A36+SLC25A1	Pyr	-0.232504
MTCH2	SLC25A36	0.0020487	-0.20926	MTCH2+SLC25A36	Pyr	-0.20926
SLC25A37	SLC25A28	0.00297645	-0.308143	SLC25A37+SLC25A28	Pyr	-0.308143
SLC16A1	SLC25A26	0.00367088	0.336436	SLC16A1+SLC25A26	Pyr	0.336436
MTCH2	SLC25A1	0.00421314	0.253791	MTCH2+SLC25A1	Pyr	0.253791
SLC25A36	SLC25A20	0.00444591	-0.121683	SLC25A36+SLC25A20	Pyr	-0.121683
SLC25A36	SLC25A19	0.00463247	-0.178588	SLC25A36+SLC25A19	Pyr	-0.178588
EEF2	SLC25A1	0.00516318	0.421924	EEF2+SLC25A1	Pyr	0.421924
EEF2	SLC25A33	0.00552833	-0.25356	EEF2+SLC25A33	Pyr	-0.25356
SLC25A43	SLC25A1	0.00617072	-0.201241	SLC25A43+SLC25A1	Pyr	-0.201241
SLC30A9	SLC25A1	0.00725999	0.270474	SLC30A9+SLC25A1	Pyr	0.270474
MTCH2	SLC25A19	0.0112136	0.257813	MTCH2+SLC25A19	Pyr	0.257813
SLC25A45	SLC25A13	0.0126666	-0.196781	SLC25A45+SLC25A13	Pyr	-0.196781
SLC25A39	SLC25A37	0.0126666	0.243095	SLC25A39+SLC25A37	Pyr	0.243095
MCL1	BCL2L1	0.0126666	-0.538181	MCL1+BCL2L1	Pyr	-0.538181
SLC30A9	SLC25A14	0.0158942	-0.14423	SLC30A9+SLC25A14	Pyr	-0.14423
SLC30A9	SLC25A26	0.0179743	0.213295	SLC30A9+SLC25A26	Pyr	0.213295
SLC30A9	SLC25A36	0.0179743	0.249011	SLC30A9+SLC25A36	Pyr	0.249011
SLC30A9	SLC16A1	0.0195403	0.326502	SLC30A9+SLC16A1	Pyr	0.326502
SLC25A36	SLC25A33	5.17052e-07	-0.553902	SLC25A36+SLC25A33	Anti	-0.553902
MTCH2	MTCH1	1.22673e-05	-0.444083	MTCH2+MTCH1	Anti	-0.444083
SLC25A19	SLC25A11	1.40515e-05	-0.284512	SLC25A19+SLC25A11	Anti	-0.284512
SLC25A6	SLC25A5	6.88413e-05	-0.370451	SLC25A6+SLC25A5	Anti	-0.370451
SLC16A1	SLC25A1	7.90193e-05	0.309796	SLC16A1+SLC25A1	Anti	0.309796
SLC25A36	SLC25A19	8.92851e-05	0.210004	SLC25A36+SLC25A19	Anti	0.210004
SLC25A39	SLC25A37	0.000117767	0.317154	SLC25A39+SLC25A37	Anti	0.317154
MTCH2	SLC25A20	0.000180564	-0.305442	MTCH2+SLC25A20	Anti	-0.305442
SLC25A36	SLC25A25	0.00048616	-0.300991	SLC25A36+SLC25A25	Anti	-0.300991
SLC16A1	SLC25A3	0.00156292	0.261186	SLC16A1+SLC25A3	Anti	0.261186
SLC25A37	SLC25A28	0.00276145	-0.236771	SLC25A37+SLC25A28	Anti	-0.236771
SLC30A9	SLC16A1	0.00581527	0.311736	SLC30A9+SLC16A1	Anti	0.311736
BCL2L1	SLC16A1	0.00869205	0.32429	BCL2L1+SLC16A1	Anti	0.32429
SLC25A31	SLC25A11	0.0151713	0.132999	SLC25A31+SLC25A11	Anti	0.132999
SLC25A32	SLC25A26	0.0151713	0.254193	SLC25A32+SLC25A26	Anti	0.254193
SLC16A11	SLC25A35	0.0151713	0.156894	SLC16A11+SLC25A35	Anti	0.156894
SLC25A36	SLC25A35	0.0157699	-0.0869604	SLC25A36+SLC25A35	Anti	-0.0869604

## Sheet: SLC25_family_only_sig_0.02
Gene+Gene	Glc	Gal	Anti	Pyr	Direction	sko_A	sko_B	Paralogs	Comments
MTCH2+MTCH1	#N/A	-0.378515	-0.444083	#N/A	-	-1.24527	-0.186927	yes					Small effect size: all interactions < 0.25 pi score
MTCH2+SLC25A1	0.317242	#N/A	#N/A	0.253791	+	-1.24527	-1.40094		Exclude; "deader than dead"
MTCH2+SLC25A19	0.24407	#N/A	#N/A	0.257813	+	-1.24527	-0.784617		Exclude; "deader than dead"
MTCH2+SLC25A2	-0.225825	#N/A	#N/A	#N/A	-	-1.24527	0.0329448		Exclude; small effect size
MTCH2+SLC25A20	#N/A	#N/A	-0.305442	#N/A	-	-1.24527	0.0684099	no
MTCH2+SLC25A36	-0.37848	#N/A	#N/A	-0.20926	-	-1.24527	1.13272	no
SLC25A19+SLC25A11	#N/A	#N/A	-0.284512	#N/A	-	-0.784617	-0.0796298	no
SLC25A30+SLC25A14	#N/A	-0.121436	#N/A	#N/A	-	-0.0195455	0.0118894		Exclude; small effect size
SLC25A31+SLC25A11	#N/A	#N/A	0.132999	#N/A	+	0.0291329	-0.0796298		Exclude; small effect size
SLC25A32+SLC25A26	#N/A	#N/A	0.254193	#N/A	+	-0.799792	-1.00782		Exclude; "deader than dead"
SLC25A33+SLC25A13	0.164753	#N/A	#N/A	#N/A	+	0.793659	-0.195332		Exclude; small effect size
SLC25A36+SLC25A1	-0.302355	#N/A	#N/A	-0.232504	-	1.13272	-1.40094	no
SLC25A36+SLC25A19	#N/A	#N/A	0.210004	-0.178588	+/-	1.13272	-0.784617		Exclude; small effect size
SLC25A36+SLC25A20	#N/A	#N/A	#N/A	-0.121683	-	1.13272	0.0684099		Exclude; "ceiling effect"
SLC25A36+SLC25A25	-0.481218	-0.130968	-0.300991	-0.268093	-	1.13272	0.563824		Exclude; "ceiling effect"
SLC25A36+SLC25A3	-0.157384	#N/A	#N/A	#N/A	-	1.13272	-0.464295		Exclude; small effect size
SLC25A36+SLC25A33	-0.383594	-0.0888402	-0.553902	-0.44666	-	1.13272	0.793659		Exclude; "ceiling effect"
SLC25A36+SLC25A35	#N/A	#N/A	-0.0869604	#N/A	-	1.13272	-0.0397251		Exclude; small effect size
SLC25A37+SLC25A28	-0.286856	-0.244854	-0.236771	-0.308143	-	-0.0909752	0.0546488	yes
SLC25A39+SLC25A37	#N/A	#N/A	0.317154	0.243095	+	-0.312558	-0.0909752	no
SLC25A42+SLC25A16	-0.345241	-0.263305	#N/A	-0.288869	-	-0.372192	-0.420052	yes
SLC25A43+SLC25A1	-0.105976	#N/A	#N/A	-0.201241	-	0.104152	-1.40094		Exclude; small effect size
SLC25A45+SLC25A13	#N/A	#N/A	#N/A	-0.196781	-	-0.417943	-0.195332		Exclude; small effect size
SLC25A6+SLC25A5	0.285945	-0.619645	-0.370451	#N/A	+	0.264721	0.226811	yes
