# Supplementary material for: Combinatorial G x G x E CRISPR screening and functional analysis highlights SLC25A39 in mitochondrial GSH transport
Source: Research Square preprint supplement (doi:10.21203/rs.3.rs-955541/v1), 2021-10-06
Supplement: Supplementary file 2 [file 70a87a9293dba59ee1d0f1c8.xlsx]

## Sheet: Summary
Supplementary Table 2: Summary of all single gene x environment interactions
tabledata: All data displayed in the GxE heatmap shown in Fig. 2a
Selected model results: those genexenvironment interactions with a pvalue < 0.05 and an absolute effect size of at least 0.25.

## Sheet: tabledata
Gene	Glucose	Galactose	Antimycin	Pyruvate
BCL2L1	-0.904559	-1.63789	-1.32606	-1.04036
EEF2	-1.56592	-1.56228	-1.42052	-1.53768
MCL1	-0.508855	-0.754418	-0.62033	-0.51376
MTCH1	-0.0972048	-0.151692	-0.0864588	-0.194285
MTCH2	-1.15555	-0.508197	-0.197118	-1.1185
SLC16A1	-1.47153	-0.735649	-1.40491	-1.49669
SLC16A11	-0.235651	-0.156204	0.0960142	-0.257116
SLC16A7	0.249159	0.0889531	0.173772	0.178723
SLC22A4	-0.139079	-0.156564	-0.124774	-0.173367
SLC25A1	-1.31121	-1.27227	-1.04797	-1.69739
SLC25A10	-0.240079	-0.418505	-0.575341	-0.292299
SLC25A11	0.010092	-0.0670994	0.211153	-0.241894
SLC25A12	0.070221	-0.00098553	-0.158967	-0.0353543
SLC25A13	-0.10561	-0.0879417	-0.35655	-0.136847
SLC25A14	0.101611	-0.230282	0.101336	0.0397671
SLC25A15	-0.0384895	-0.0449552	-0.0445147	-0.0394553
SLC25A16	-0.330331	-0.394927	-0.182561	-0.310824
SLC25A17	0.198907	0.105892	0.146042	0.165166
SLC25A18	-0.292619	-0.369573	-0.340469	-0.355033
SLC25A19	-0.694895	-0.941676	0.705628	-0.716836
SLC25A2	0.122667	-0.0409527	0.0713701	0.0521468
SLC25A20	0.158132	-0.171057	0.00875658	0.0914737
SLC25A21	0.281096	0.12248	0.258656	0.205362
SLC25A22	-0.286667	0.00366617	0.124329	-0.205153
SLC25A23	-0.228339	-0.22356	-0.205548	-0.248922
SLC25A24	-0.18501	-0.140216	0.203066	-0.192882
SLC25A25	0.653546	0.30719	0.28665	0.413323
SLC25A26	-0.918102	-0.849056	-0.865693	-0.905784
SLC25A27	-0.133496	-0.132497	-0.0542766	-0.216683
SLC25A28	0.144371	-0.0438018	0.0380635	0.126512
SLC25A29	0.16882	0.0627946	0.150892	0.141136
SLC25A3	-0.374573	-0.676593	-0.715796	-0.488643
SLC25A30	0.0701762	-0.225669	0.200512	0.0380153
SLC25A31	0.118855	0.0335482	0.144005	0.114824
SLC25A32	-0.71007	-0.0326762	-0.594656	-0.794268
SLC25A33	0.88338	0.314406	0.825824	0.695082
SLC25A34	0.294186	0.161077	0.391147	0.242283
SLC25A35	0.0499967	0.0107083	0.330987	0.0511627
SLC25A36	1.22244	0.222824	0.716336	0.870746
SLC25A37	-0.00125344	-0.377778	-0.178922	-0.118075
SLC25A38	-0.225779	-0.149071	-0.215675	-0.250136
SLC25A39	-0.222836	-0.11705	0.240925	-0.157436
SLC25A4	0.0652417	-0.0828637	0.026845	0.0360612
SLC25A40	0.349348	0.162332	0.258964	0.258187
SLC25A41	0.00645145	-0.0330134	0.0323074	-0.0288785
SLC25A42	-0.28247	-0.257655	-0.201106	-0.350295
SLC25A43	0.193874	0.113384	0.107328	0.179905
SLC25A44	0.207128	0.0430381	0.11586	0.20249
SLC25A45	-0.328221	-0.297996	-0.355691	-0.337615
SLC25A46	0.0602702	0.00333844	-0.186109	0.0555605
SLC25A47	0.150324	0.0669194	0.160288	0.147573
SLC25A48	-0.270348	-0.366397	-0.303092	-0.309691
SLC25A5	0.316533	-0.0483356	-0.325543	0.226496
SLC25A51	-0.178488	-0.240269	-0.072463	-0.174188
SLC25A52	0.20433	0.067368	0.309782	0.173369
SLC25A53	0.322335	0.176554	0.286429	0.246954
SLC25A6	0.354443	0.053014	0.10122	0.207839
SLC30A6	-0.158024	-0.152972	-0.153677	-0.1223
SLC30A9	-1.31607	-1.13123	-1.21673	-1.3573
SLC37A4	-0.102839	-0.0885129	0.0259714	-0.0831242
UCP1	0.348645	0.17575	0.336528	0.298541
UCP2	0.250219	0.137259	0.241159	0.230009
UCP3	0.105309	0.0518267	0.0313701	0.0892016
Control	0.0195125	-0.0559293	0.00774525	-0.0219287

## Sheet: selected_model_results
geneCondition	Estimate	Std. Error	t value	Pr(>|t|)
geneSLC25A19:conditionAnti15	1.43995	0.0524911	27.4323	3.59344e-165
geneSLC25A36:conditionGal15	-0.996195	0.0492824	-20.214	1.03846e-90
geneMTCH2:conditionAnti15	1.00552	0.0566968	17.735	2.75741e-70
geneSLC16A1:conditionGal15	0.839554	0.0492824	17.0356	5.32062e-65
geneSLC25A32:conditionGal15	0.934233	0.0569768	16.3967	2.34202e-60
geneSLC25A5:conditionAnti15	-0.642493	0.0491009	-13.0852	4.25389e-39
geneBCL2L1:conditionGal15	-0.888205	0.0694391	-12.7911	1.9427e-37
geneSLC25A33:conditionGal15	-0.607679	0.049466	-12.2848	1.14609e-34
geneMTCH2:conditionGal15	0.678593	0.0566968	11.9688	5.40278e-33
geneSLC25A36:conditionAnti15	-0.529654	0.0492824	-10.7473	6.27221e-27
geneSLC25A39:conditionAnti15	0.467831	0.052713	8.87506	7.08115e-19
geneSLC25A22:conditionAnti15	0.398935	0.0496516	8.03468	9.46499e-16
geneSLC25A5:conditionGal15	-0.392119	0.0491009	-7.98598	1.40613e-15
geneSLC25A24:conditionAnti15	0.379658	0.0496516	7.64645	2.08109e-14
geneSLC25A37:conditionGal15	-0.434583	0.0569768	-7.62737	2.41319e-14
geneSLC25A36:conditionPyr15	-0.339998	0.0492824	-6.89897	5.26339e-12
geneSLC25A20:conditionGal15	-0.330124	0.049466	-6.67376	2.50382e-11
geneSLC25A30:conditionGal15	-0.318029	0.0492824	-6.45319	1.09928e-10
geneSLC25A25:conditionAnti15	-0.341417	0.0531655	-6.42179	1.35176e-10
geneSLC25A3:conditionAnti15	-0.336043	0.0529378	-6.34788	2.1906e-10
geneSLC25A10:conditionAnti15	-0.328218	0.0529378	-6.20008	5.66151e-10
geneSLC25A35:conditionAnti15	0.302283	0.0498393	6.06516	1.32205e-09
geneSLC25A25:conditionGal15	-0.321954	0.0531655	-6.05569	1.40223e-09
geneSLC16A11:conditionAnti15	0.317055	0.0529378	5.9892	2.11464e-09
geneSLC25A3:conditionGal15	-0.315025	0.0529378	-5.95086	2.67467e-09
geneSLC25A14:conditionGal15	-0.310393	0.052713	-5.88837	3.9105e-09
geneBCL2L1:conditionAnti15	-0.405875	0.0694391	-5.84505	5.07689e-09
geneSLC25A19:conditionGal15	-0.295315	0.0524911	-5.62601	1.84824e-08
geneSLC25A1:conditionPyr15	-0.298268	0.0531655	-5.61018	2.02556e-08
geneSLC25A22:conditionGal15	0.276642	0.0496516	5.57167	2.52832e-08
geneSLC25A6:conditionGal15	-0.271771	0.0492824	-5.51457	3.50338e-08
geneSLC25A32:conditionAnti15	0.301783	0.0569768	5.29659	1.18189e-07
