# Supplementary material for: Combinatorial G x G x E CRISPR screening and functional analysis highlights SLC25A39 in mitochondrial GSH transport
Source: Research Square preprint supplement (doi:10.21203/rs.3.rs-955541/v1), 2021-10-06
Supplement: Supplementary file 3 [file eb3a197446f7e27fd2171fd1.xlsx]

## Sheet: summary
Supplementary Table 5: Expression profiles of SLC25 genes in K562 cells
all_genes: FPKM_log2 values of all human genes
SLC25: FPKM_log2 values of all SLC25 genes, these highlighted in yellow are the ones not expressed

## Sheet: all_genes
Annotated.Gene.Symbol	K562_rnaseq_FPKM_log2	SLC25?
A1BG	0.650765	0
A1CF	-5.64386	0
A2M	-7	0
A2ML1	-4.64386	0
A3GALT2	-7	0
A4GALT	-7	0
A4GNT	-5.05889	0
AAAS	5.81813	0
AACS	2.24793	0
AADAC	-5.64386	0
AADACL2	-7	0
AADACL3	-7	0
AADACL4	-5.05889	0
AADAT	-7	0
AAED1	3.59216	0
AAGAB	4.88069	0
AAK1	0.226509	0
AAMDC	3.68257	0
AAMP	5.61824	0
AANAT	-7	0
AAR2	3.848	0
AARD	-6.64386	0
AARS	7.96988	0
AARS2	3.59335	0
AARSD1	4.90929	0
AASDH	3.1177	0
AASDHPPT	5.51223	0
AASS	-1.32193	0
AATF	5.98823	0
AATK	-3.8365	0
ABAT	-3.47393	0
ABCA1	-7	0
ABCA10	-1.94342	0
ABCA12	-7	0
ABCA13	-3.47393	0
ABCA2	2.37851	0
ABCA3	3.32048	0
ABCA4	-5.64386	0
ABCA5	-1.152	0
ABCA6	-5.64386	0
ABCA7	4.65019	0
ABCA8	1.60407	0
ABCA9	-2.39593	0
ABCB1	3.75382	0
ABCB10	5.88996	0
ABCB11	-5.64386	0
ABCB4	-0.535332	0
ABCB5	-3.18442	0
ABCB6	4.46074	0
ABCB7	4.43496	0
ABCB8	4.21956	0
ABCB9	1.33914	0
ABCC1	4.23955	0
ABCC10	2.62761	0
ABCC11	-6.64386	0
ABCC12	-7	0
ABCC2	-5.05889	0
ABCC3	-2.47393	0
ABCC4	4.41549	0
ABCC5	4.52795	0
ABCC6	-4.64386	0
ABCC8	-7	0
ABCC9	3.3978	0
ABCD1	0.765535	0
ABCD2	-6.64386	0
ABCD3	3.5435	0
ABCD4	2.01078	0
ABCE1	6.33199	0
ABCF1	6.02813	0
ABCF2	6.10748	0
ABCF3	4.37434	0
ABCG1	-7	0
ABCG2	-5.05889	0
ABCG4	-6.64386	0
ABCG5	-7	0
ABCG8	-7	0
ABHD1	-5.05889	0
ABHD10	3.20945	0
ABHD11	3.51475	0
ABHD12	2.91456	0
ABHD12B	-7	0
ABHD13	1.60407	0
ABHD14A	2.38681	0
ABHD14B	5.56163	0
ABHD15	0.887525	0
ABHD16A	5.81992	0
ABHD16B	2.25096	0
ABHD17A	4.78031	0
ABHD17B	2.73552	0
ABHD17C	-2.73697	0
ABHD18	#N/A	0
ABHD2	4.56864	0
ABHD3	3.52482	0
ABHD4	2.9855	0
ABHD5	4.3799	0
ABHD6	0.485427	0
ABHD8	1.96347	0
ABI1	4.41819	0
ABI2	2.43829	0
ABI3	-7	0
ABI3BP	-4.05889	0
ABL1	5.80839	0
ABL2	2.05658	0
ABLIM1	-2.05889	0
ABLIM2	-7	0
ABLIM3	-2	0
ABO	#N/A	0
ABR	-0.268817	0
ABRA	-6.64386	0
ABRACL	2.8339	0
ABT1	4.50462	0
ABTB1	-0.340075	0
ABTB2	-2.94342	0
ACAA1	4.63923	0
ACAA2	4.26379	0
ACACA	4.82324	0
ACACB	-2.05889	0
ACAD10	3.06523	0
ACAD11	0.847997	0
ACAD8	3.60999	0
ACAD9	3.3505	0
ACADL	-7	0
ACADM	5.54844	0
ACADS	3.43162	0
ACADSB	1.57531	0
ACADVL	6.64559	0
ACAN	-6.64386	0
ACAP1	1.20163	0
ACAP2	3.88264	0
ACAP3	3.6241	0
ACAT1	5.64126	0
ACAT2	6.68454	0
ACBD3	4.80426	0
ACBD4	2.29866	0
ACBD5	2.53356	0
ACBD6	5.43996	0
ACBD7	-0.136062	0
ACCS	2.83996	0
ACCSL	-7	0
ACD	4.04089	0
ACE	-1.47393	0
ACE2	-4.64386	0
ACER1	-7	0
ACER2	0.443607	0
ACER3	2.32769	0
ACHE	1.57046	0
ACIN1	6.08491	0
ACKR1	-1.68966	0
ACKR2	-1.05889	0
ACKR3	-7	0
ACKR4	-1.55639	0
ACLY	6.72778	0
ACMSD	-7	0
ACO1	3.97453	0
ACO2	6.10329	0
ACOD1	#N/A	0
ACOT1	-5.64386	0
ACOT11	-4.05889	0
ACOT12	-6.64386	0
ACOT13	3.848	0
ACOT2	-3.8365	0
ACOT4	-7	0
ACOT6	-7	0
ACOT7	5.55551	0
ACOT8	3.81967	0
ACOT9	4.54164	0
ACOX1	2.46467	0
ACOX2	-7	0
ACOX3	1.05658	0
ACOXL	-5.05889	0
ACP1	6.63416	0
ACP2	2.70487	0
ACP5	-2	0
ACP6	-1.64386	0
ACP7	#N/A	0
ACPP	-6.64386	0
ACPT	-5.64386	0
ACR	-7	0
ACRBP	0.201634	0
ACRC	-1.35845	0
ACRV1	-2.8365	0
ACSBG1	-2.8365	0
ACSBG2	-3.8365	0
ACSF2	0.176323	0
ACSF3	2.69599	0
ACSL1	3.76129	0
ACSL3	5.00405	0
ACSL4	3.80323	0
ACSL5	-1.55639	0
ACSL6	-1.08927	0
ACSM1	-1.12029	0
ACSM2A	-7	0
ACSM2B	-6.64386	0
ACSM3	6.96993	0
ACSM4	-6.64386	0
ACSM5	-7	0
ACSM6	-7	0
ACSS1	-0.0588937	0
ACSS2	5.42055	0
ACSS3	-7	0
ACTA1	-5.64386	0
ACTA2	-1.4344	0
ACTB	10.285	0
ACTBL2	-7	0
ACTC1	-4.64386	0
ACTG1	9.44259	0
ACTG2	-5.64386	0
ACTL10	-2.32193	0
ACTL6A	6.28485	0
ACTL6B	-7	0
ACTL7A	-7	0
ACTL7B	-7	0
ACTL8	0.516015	0
ACTL9	-5.64386	0
ACTN1	4.8515	0
ACTN2	-2.47393	0
ACTN3	#N/A	0
ACTN4	6.59634	0
ACTR10	3.851	0
ACTR1A	4.97453	0
ACTR1B	4.36177	0
ACTR2	7.22052	0
ACTR3	6.04089	0
ACTR3B	3.38957	0
ACTR3C	2.14731	0
ACTR5	2.69822	0
ACTR6	4.99729	0
ACTR8	2.15056	0
ACTRT1	-7	0
ACTRT2	-7	0
ACTRT3	-6.64386	0
ACVR1	3.41007	0
ACVR1B	1.71809	0
ACVR1C	-2.18442	0
ACVR2A	-1.12029	0
ACVR2B	3.28244	0
ACVRL1	-3.05889	0
ACY1	5.7046	0
ACY3	-7	0
ACYP1	4.83946	0
ACYP2	0.15056	0
ADA	1.67807	0
ADAD1	-7	0
ADAD2	-7	0
ADAL	3.49825	0
ADAM10	4.53854	0
ADAM11	-4.32193	0
ADAM12	-7	0
ADAM15	4.33628	0
ADAM17	3.60288	0
ADAM18	-7	0
ADAM19	-1.47393	0
ADAM2	-7	0
ADAM20	-7	0
ADAM21	-4.32193	0
ADAM22	-3.8365	0
ADAM23	-7	0
ADAM28	-7	0
ADAM29	-7	0
ADAM30	-7	0
ADAM32	-5.05889	0
ADAM33	-7	0
ADAM7	-7	0
ADAM8	1.5656	0
ADAM9	4.1643	0
ADAMDEC1	-7	0
ADAMTS1	-7	0
ADAMTS10	-4.64386	0
ADAMTS12	-7	0
ADAMTS13	-3.32193	0
ADAMTS14	4.6017	0
ADAMTS15	-7	0
ADAMTS16	-7	0
ADAMTS17	-6.64386	0
ADAMTS18	-7	0
ADAMTS19	-7	0
ADAMTS2	-7	0
ADAMTS20	-4.64386	0
ADAMTS3	3.05311	0
ADAMTS4	-1.4344	0
ADAMTS5	-7	0
ADAMTS6	-1.39593	0
ADAMTS7	-7	0
ADAMTS8	-7	0
ADAMTS9	-7	0
ADAMTSL1	-6.64386	0
ADAMTSL2	-2.94342	0
ADAMTSL3	-6.64386	0
ADAMTSL4	6.56362	0
ADAMTSL5	1.92979	0
ADAP1	-1.64386	0
ADAP2	-6.64386	0
ADAR	5.41886	0
ADARB1	0.963474	0
ADARB2	-6.64386	0
ADAT1	2.46205	0
ADAT2	3.20633	0
ADAT3	1.43296	0
ADCK1	2.43563	0
ADCK2	3.33914	0
ADCK3	4.79129	0
ADCK4	2.96162	0
ADCK5	2.5656	0
ADCY1	-4.05889	0
ADCY10	-2.64386	0
ADCY2	-4.64386	0
ADCY3	3.38819	0
ADCY4	-5.05889	0
ADCY5	-5.05889	0
ADCY6	0.722466	0
ADCY7	4.38957	0
ADCY8	-6.64386	0
ADCY9	-4.32193	0
ADCYAP1	-6.64386	0
ADCYAP1R1	-7	0
ADD1	5.53667	0
ADD2	5.62615	0
ADD3	4.52795	0
ADGB	#N/A	0
ADGRA1	#N/A	0
ADGRA2	#N/A	0
ADGRA3	#N/A	0
ADGRB1	#N/A	0
ADGRB2	#N/A	0
ADGRB3	#N/A	0
ADGRD1	#N/A	0
ADGRE1	#N/A	0
ADGRE2	#N/A	0
ADGRE3	#N/A	0
ADGRE5	#N/A	0
ADGRF1	#N/A	0
ADGRF2	#N/A	0
ADGRF3	#N/A	0
ADGRF4	#N/A	0
ADGRF5	#N/A	0
ADGRG1	#N/A	0
ADGRG2	#N/A	0
ADGRG3	#N/A	0
ADGRG4	#N/A	0
ADGRG5	#N/A	0
ADGRG6	#N/A	0
ADGRG7	#N/A	0
ADGRL1	#N/A	0
ADGRL2	#N/A	0
ADGRL3	#N/A	0
ADGRL4	#N/A	0
ADGRV1	#N/A	0
ADH1A	-7	0
ADH1B	-7	0
ADH1C	#N/A	0
ADH4	-5.64386	0
ADH5	6.41058	0
ADH6	-2.94342	0
ADH7	-7	0
ADHFE1	-6.64386	0
ADI1	4.76447	0
ADIG	-7	0
ADIPOQ	-7	0
ADIPOR1	6.49073	0
ADIPOR2	4.95606	0
ADIRF	-7	0
ADK	5.10978	0
ADM	-3.05889	0
ADM2	2.26303	0
ADM5	1.43829	0
ADNP	4.63285	0
ADNP2	3.37156	0
ADO	3.01257	0
ADORA1	-7	0
ADORA2A	-1.25154	0
ADORA2B	2.21412	0
ADORA3	-5.64386	0
ADPGK	4.53667	0
ADPRH	-0.136062	0
ADPRHL1	-2.05889	0
ADPRHL2	4.54288	0
ADPRM	2.03914	0
ADRA1A	-2.12029	0
ADRA1B	-6.64386	0
ADRA1D	-4.05889	0
ADRA2A	-7	0
ADRA2B	-6.64386	0
ADRA2C	-2.32193	0
ADRB1	-4.64386	0
ADRB2	-4.32193	0
ADRB3	-7	0
ADRBK1	5.27873	0
ADRBK2	1.08406	0
ADRM1	6.01859	0
ADSL	6.5697	0
ADSS	5.10769	0
ADSSL1	1.15056	0
ADTRP	1.95606	0
AEBP1	-4.64386	0
AEBP2	2.47249	0
AEN	3.81352	0
AES	7.28605	0
AFAP1	-0.915936	0
AFAP1L1	-5.05889	0
AFAP1L2	-7	0
AFF1	3.30597	0
AFF2	-5.05889	0
AFF3	-6.64386	0
AFF4	3.16832	0
AFG3L2	5.83719	0
AFM	-5.64386	0
AFMID	4.46532	0
AFP	-2	0
AFTPH	2.97636	0
AGA	2.33628	0
AGAP1	2.12102	0
AGAP11	#N/A	0
AGAP2	-3.47393	0
AGAP3	5.33128	0
AGAP4	#N/A	0
AGAP5	2.30159	0
AGAP6	4.40395	0
AGAP9	2.81558	0
AGBL1	-7	0
AGBL2	-3.64386	0
AGBL3	-4.32193	0
AGBL4	-6.64386	0
AGBL5	4.47832	0
AGER	2.67129	0
AGFG1	3.27202	0
AGFG2	1.63227	0
AGGF1	3.39643	0
AGK	4.80478	0
AGL	3.61824	0
AGMAT	-4.05889	0
AGMO	0.970854	0
AGO1	3.67469	0
AGO2	3.32625	0
AGO3	2.45418	0
AGO4	2.7137	0
AGPAT1	6.71053	0
AGPAT2	4.0268	0
AGPAT3	4.21023	0
AGPAT4	1.39506	0
AGPAT5	4.34696	0
AGPS	4.6241	0
AGR2	-7	0
AGR3	-7	0
AGRN	4.50843	0
AGRP	-7	0
AGT	-7	0
AGTPBP1	1.48543	0
AGTR1	-7	0
AGTR2	-7	0
AGTRAP	5.51633	0
AGXT	-7	0
AGXT2	-7	0
AHCTF1	4.53107	0
AHCY	7.5562	0
AHCYL1	5.82197	0
AHCYL2	1.66903	0
AHDC1	2.27501	0
AHI1	3.20477	0
AHNAK	3.22033	0
AHNAK2	-6.64386	0
AHR	-5.64386	0
AHRR	-2.32193	0
AHSA1	6.29094	0
AHSA2	4.26828	0
AHSG	-7	0
AHSP	4.64674	0
AICDA	-3.18442	0
AIDA	5.5373	0
AIF1	2.9855	0
AIF1L	0.298658	0
AIFM1	5.90521	0
AIFM2	3.0197	0
AIFM3	-4.05889	0
AIG1	6.47671	0
AIM1	-4.32193	0
AIM1L	#N/A	0
AIM2	-3.64386	0
AIMP1	5.15866	0
AIMP2	5	0
AIP	5.39917	0
AIPL1	-2.32193	0
AIRE	-7	0
AJAP1	-7	0
AJUBA	1.07039	0
AK1	3.82782	0
AK2	7.27743	0
AK3	4.30524	0
AK4	3.19849	0
AK5	-6.64386	0
AK6	6.15401	0
AK7	-2.55639	0
AK8	-5.64386	0
AK9	-0.862496	0
AKAIN1	#N/A	0
AKAP1	4.10182	0
AKAP10	2.67807	0
AKAP11	3.66903	0
AKAP12	-3.18442	0
AKAP13	-3.8365	0
AKAP14	-7	0
AKAP17A	3.58135	0
AKAP2	-7	0
AKAP3	-3.05889	0
AKAP4	-7	0
AKAP5	-0.943416	0
AKAP6	-4.05889	0
AKAP7	0.356144	0
AKAP8	3.31615	0
AKAP8L	5.38578	0
AKAP9	3.35755	0
AKIP1	4.56925	0
AKIRIN1	5.68004	0
AKIRIN2	4.58556	0
AKNA	2.28096	0
AKNAD1	-6.64386	0
AKR1A1	6.1416	0
AKR1B1	2.73769	0
AKR1B10	-5.05889	0
AKR1B15	-3.05889	0
AKR1C1	5.66021	0
AKR1C2	3.0197	0
AKR1C3	3.30743	0
AKR1C4	-7	0
AKR1D1	-5.64386	0
AKR1E2	1.93357	0
AKR7A2	4.51728	0
AKR7A3	-0.217591	0
AKT1	5.53201	0
AKT1S1	4.52544	0
AKT2	4.65076	0
AKT3	-4.32193	0
AKTIP	1.4489	0
ALAD	2.81352	0
ALAS1	4.6094	0
ALAS2	5.93711	0
ALB	-5.64386	0
ALCAM	-6.64386	0
ALDH16A1	3.95327	0
ALDH18A1	5.13586	0
ALDH1A1	2.20789	0
ALDH1A2	7.28003	0
ALDH1A3	-6.64386	0
ALDH1B1	3.93263	0
ALDH1L1	-5.05889	0
ALDH1L2	3.0054	0
ALDH2	4.65992	0
ALDH3A1	-7	0
ALDH3A2	-5.64386	0
ALDH3B1	#N/A	0
ALDH3B2	-7	0
ALDH4A1	3.42358	0
ALDH5A1	3.2555	0
ALDH6A1	2.58015	0
ALDH7A1	-7	0
ALDH8A1	-4.32193	0
ALDH9A1	4.68089	0
ALDOA	11.1075	0
ALDOB	-5.64386	0
ALDOC	7.83378	0
ALG1	3.15866	0
ALG10	1.75275	0
ALG10B	1.46467	0
ALG11	1.9486	0
ALG12	2.32769	0
ALG13	3.62059	0
ALG14	2.40054	0
ALG1L	1.67807	0
ALG1L2	#N/A	0
ALG2	2.98368	0
ALG3	6.03364	0
ALG5	4.55949	0
ALG6	2.36177	0
ALG8	5.47573	0
ALG9	2.54844	0
ALK	-7	0
ALKBH1	2.31904	0
ALKBH2	4.65363	0
ALKBH3	3.55213	0
ALKBH4	2.88753	0
ALKBH5	5.0751	0
ALKBH6	3.27352	0
ALKBH7	4.25248	0
ALKBH8	1.73118	0
ALLC	-7	0
ALMS1	1.5509	0
ALOX12	1.59455	0
ALOX12B	-6.64386	0
ALOX15	-7	0
ALOX15B	-7	0
ALOX5	-0.836501	0
ALOX5AP	-7	0
ALOXE3	-6.64386	0
ALPI	-7	0
ALPK1	-0.666576	0
ALPK2	-6.64386	0
ALPK3	-5.05889	0
ALPL	-5.64386	0
ALPP	-7	0
ALPPL2	-7	0
ALS2	2.36737	0
ALS2CL	-6.64386	0
ALS2CR11	-6.64386	0
ALS2CR12	-6.64386	0
ALX1	-2.18442	0
ALX3	0.411426	0
ALX4	-0.514573	0
ALYREF	6.83744	0
AMACR	0.85599	0
AMBN	-7	0
AMBP	-7	0
AMBRA1	3.21412	0
AMD1	5.44989	0
AMDHD1	-7	0
AMDHD2	2.64386	0
AMELX	-7	0
AMELY	-7	0
AMER1	0.454176	0
AMER2	-6.64386	0
AMER3	-7	0
AMFR	5.69961	0
AMH	2.34483	0
AMHR2	2.57046	0
AMIGO1	-1.59946	0
AMIGO2	0.400538	0
AMIGO3	0.887525	0
AMMECR1	4.6153	0
AMMECR1L	2.9782	0
AMN	-7	0
AMN1	2.0072	0
AMOT	-7	0
AMOTL1	4.05224	0
AMOTL2	-7	0
AMPD1	-7	0
AMPD2	4.07553	0
AMPD3	2.78031	0
AMPH	-5.05889	0
AMT	0.189034	0
AMTN	-7	0
AMY1A	#N/A	0
AMY1B	#N/A	0
AMY1C	#N/A	0
AMY2A	-7	0
AMY2B	-0.37707	0
AMZ1	-6.64386	0
AMZ2	4.72137	0
ANAPC1	4.79181	0
ANAPC10	3.87283	0
ANAPC11	6.53559	0
ANAPC13	5.55152	0
ANAPC15	5.36177	0
ANAPC16	5.26791	0
ANAPC2	3.52356	0
ANAPC4	4.08406	0
ANAPC5	6.70736	0
ANAPC7	5.74551	0
ANG	-3.64386	0
ANGEL1	3.27053	0
ANGEL2	2.93357	0
ANGPT1	4.24031	0
ANGPT2	-5.05889	0
ANGPT4	-7	0
ANGPTL1	-6.64386	0
ANGPTL2	-7	0
ANGPTL3	-5.05889	0
ANGPTL4	-1.25154	0
ANGPTL5	-7	0
ANGPTL6	-1.94342	0
ANGPTL7	-5.64386	0
ANGPTL8	#N/A	0
ANHX	-7	0
ANK1	5.34163	0
ANK2	-7	0
ANK3	1.34483	0
ANKAR	-3.64386	0
ANKDD1A	-2.47393	0
ANKDD1B	-6.64386	0
ANKEF1	0.505891	0
ANKFN1	-2.32193	0
ANKFY1	3.05832	0
ANKH	1.32769	0
ANKHD1	4.72137	0
ANKHD1-EIF4EBP3	2.95791	0
ANKIB1	3.03386	0
ANKK1	-7	0
ANKLE1	1.28688	0
ANKLE2	4.07895	0
ANKMY1	1.79077	0
ANKMY2	4.76129	0
ANKRA2	2.80323	0
ANKRD1	-7	0
ANKRD10	4.61765	0
ANKRD11	4.25701	0
ANKRD12	2.5656	0
ANKRD13A	4.21023	0
ANKRD13B	2.40327	0
ANKRD13C	2.22033	0
ANKRD13D	3.09085	0
ANKRD16	2.55336	0
ANKRD17	4.71205	0
ANKRD18A	-1.05889	0
ANKRD18B	#N/A	0
ANKRD2	-7	0
ANKRD20A1	#N/A	0
ANKRD20A2	#N/A	0
ANKRD20A3	#N/A	0
ANKRD20A4	#N/A	0
ANKRD22	-7	0
ANKRD23	2.37016	0
ANKRD24	-4.64386	0
ANKRD26	1.9222	0
ANKRD27	4.97177	0
ANKRD28	4.1416	0
ANKRD30A	-5.64386	0
ANKRD30B	-7	0
ANKRD31	-4.64386	0
ANKRD33	-3.47393	0
ANKRD33B	-0.810966	0
ANKRD34A	-0.836501	0
ANKRD34B	-7	0
ANKRD34C	-6.64386	0
ANKRD35	-5.05889	0
ANKRD36	1.50589	0
ANKRD36B	#N/A	0
ANKRD37	4.1127	0
ANKRD39	4.78084	0
ANKRD40	3.65764	0
ANKRD42	-0.0439433	0
ANKRD44	-6.64386	0
ANKRD45	-3.64386	0
ANKRD46	2.79286	0
ANKRD49	3.39369	0
ANKRD50	1.8953	0
ANKRD52	3.39369	0
ANKRD53	-3.8365	0
ANKRD54	3.36317	0
ANKRD55	-0.862496	0
ANKRD6	-5.05889	0
ANKRD60	#N/A	0
ANKRD61	1.11103	0
ANKRD62	-2.25154	0
ANKRD63	#N/A	0
ANKRD65	-0.599462	0
ANKRD66	-7	0
ANKRD7	-7	0
ANKRD9	2.88166	0
ANKS1A	2.67356	0
ANKS1B	-5.64386	0
ANKS3	2.39506	0
ANKS4B	-3.05889	0
ANKS6	3.87774	0
ANKUB1	#N/A	0
ANKZF1	4.98368	0
ANLN	4.44029	0
ANO1	-6.64386	0
ANO10	4.69488	0
ANO2	-6.64386	0
ANO3	-3.8365	0
ANO4	-7	0
ANO5	0.389567	0
ANO6	3.45154	0
ANO7	-1.25154	0
ANO8	1.72247	0
ANO9	2.5008	0
ANOS1	#N/A	0
ANP32A	6.81698	0
ANP32B	9.24802	0
ANP32C	#N/A	0
ANP32D	-7	0
ANP32E	6.1815	0
ANPEP	-0.251539	0
ANTXR1	-2.55639	0
ANTXR2	4.31325	0
ANTXRL	-6.64386	0
ANXA1	8.22009	0
ANXA10	-7	0
ANXA11	6.57561	0
ANXA13	-7	0
ANXA2	7.63626	0
ANXA2R	1.13093	0
ANXA3	2.10434	0
ANXA4	2.21723	0
ANXA5	5.84222	0
ANXA6	1.43829	0
ANXA7	6.53574	0
ANXA8	-7	0
ANXA8L1	-7	0
ANXA9	-0.184425	0
AOAH	-7	0
AOC1	-5.64386	0
AOC2	-1.08927	0
AOC3	-2.12029	0
AOX1	-5.05889	0
AP1AR	2.84197	0
AP1B1	4.86146	0
AP1G1	3.92695	0
AP1G2	3.59813	0
AP1M1	4.81096	0
AP1M2	-4.64386	0
AP1S1	5.22843	0
AP1S2	3.68482	0
AP1S3	0.124328	0
AP2A1	6.33807	0
AP2A2	3.58616	0
AP2B1	6.72833	0
AP2M1	7.83074	0
AP2S1	6.97028	0
AP3B1	4.5656	0
AP3B2	-4.32193	0
AP3D1	5.02724	0
AP3M1	5.24413	0
AP3M2	3.1635	0
AP3S1	5.61206	0
AP3S2	3.10266	0
AP4B1	3.50589	0
AP4E1	2.23266	0
AP4M1	3.35191	0
AP4S1	0.275007	0
AP5B1	2.9241	0
AP5M1	3.45286	0
AP5S1	1.83188	0
AP5Z1	2.66448	0
APAF1	3.03914	0
APBA1	-7	0
APBA2	3.5741	0
APBA3	2.57046	0
APBB1	-2.05889	0
APBB1IP	-6.64386	0
APBB2	-2.32193	0
APBB3	2.73335	0
APC	2.27202	0
APC2	-2.94342	0
APCDD1	-7	0
APCDD1L	-7	0
APCS	-7	0
APEH	5.6401	0
APELA	#N/A	0
APEX1	6.6886	0
APEX2	4.43429	0
APH1A	5.61706	0
APH1B	1.56071	0
API5	5.91409	0
APIP	5.62673	0
APITD1	3.25852	0
APITD1-CORT	#N/A	0
APLF	-1.55639	0
APLN	-7	0
APLNR	2.04264	0
APLP1	0.815575	0
APLP2	6.20848	0
APMAP	3.46205	0
APOA1	-5.05889	0
APOA2	-3.8365	0
APOA4	-4.32193	0
APOA5	-7	0
APOB	-7	0
APOBEC1	-7	0
APOBEC2	-2.47393	0
APOBEC3A	-0.168123	0
APOBEC3B	5.01881	0
APOBEC3C	6.20261	0
APOBEC3D	2.71149	0
APOBEC3F	1.92979	0
APOBEC3G	2.14078	0
APOBEC3H	-5.05889	0
APOBEC4	-5.64386	0
APOBR	2.0635	0
APOC1	6.85736	0
APOC2	-2.64386	0
APOC3	-7	0
APOC4	-4.32193	0
APOD	-2.64386	0
APOE	3.91648	0
APOF	-5.05889	0
APOH	-7	0
APOL1	2.79701	0
APOL2	2.70266	0
APOL3	-1.05889	0
APOL4	#N/A	0
APOL5	-7	0
APOL6	-0.120294	0
APOLD1	-1.59946	0
APOM	3.3147	0
APOO	4.82375	0
APOOL	2.9542	0
APOPT1	4.18428	0
APP	-6.64386	0
APPBP2	1.99277	0
APPL1	1.93357	0
APPL2	2.41684	0
APRT	7.8666	0
APTX	4.61058	0
AQP1	3.62994	0
AQP10	2.28983	0
AQP11	0.545968	0
AQP12A	#N/A	0
AQP12B	-7	0
AQP2	-7	0
AQP3	3.75168	0
AQP4	-7	0
AQP5	-7	0
AQP6	-0.666576	0
AQP7	-4.05889	0
AQP8	-7	0
AQP9	-6.64386	0
AQR	4.58376	0
AR	-7	0
ARAF	4.82273	0
ARAP1	4.2854	0
ARAP2	-6.64386	0
ARAP3	2.52607	0
ARC	-3.47393	0
ARCN1	5.97407	0
AREG	3.88655	0
AREL1	3.20006	0
ARF1	8.49917	0
ARF3	5.37782	0
ARF4	6.11707	0
ARF5	7.03573	0
ARF6	4.31034	0
ARFGAP1	4.82069	0
ARFGAP2	5.47411	0
ARFGAP3	3.76235	0
ARFGEF1	3.37434	0
ARFGEF2	2.99277	0
ARFGEF3	#N/A	0
ARFIP1	3.24793	0
ARFIP2	3.49313	0
ARFRP1	4.20945	0
ARG1	-3.32193	0
ARG2	5.0798	0
ARGFX	-2.94342	0
ARGLU1	5.14527	0
ARHGAP1	3.71918	0
ARHGAP10	-4.05889	0
ARHGAP11A	5.14812	0
ARHGAP11B	2.95791	0
ARHGAP12	2.25096	0
ARHGAP15	2.72247	0
ARHGAP17	3.57894	0
ARHGAP18	4.89772	0
ARHGAP19	4.72574	0
ARHGAP20	-7	0
ARHGAP21	3.80219	0
ARHGAP22	2.86394	0
ARHGAP23	-1.68966	0
ARHGAP24	2.13093	0
ARHGAP25	1.926	0
ARHGAP26	-2.25154	0
ARHGAP27	-0.358454	0
ARHGAP28	0.650765	0
ARHGAP29	-7	0
ARHGAP30	-2.94342	0
ARHGAP31	-6.64386	0
ARHGAP32	-6.64386	0
ARHGAP33	2.3505	0
ARHGAP35	3.08236	0
ARHGAP36	-6.64386	0
ARHGAP4	4.37573	0
ARHGAP40	#N/A	0
ARHGAP42	#N/A	0
ARHGAP44	-3.05889	0
ARHGAP5	2.47768	0
ARHGAP6	4.82375	0
ARHGAP8	-1.88897	0
ARHGAP9	-0.666576	0
ARHGDIA	6.58331	0
ARHGDIB	5.23458	0
ARHGDIG	0.731183	0
ARHGEF1	5.2854	0
ARHGEF10	1.59455	0
ARHGEF10L	-6.64386	0
ARHGEF11	2.30743	0
ARHGEF12	4.29057	0
ARHGEF15	-7	0
ARHGEF16	-1.73697	0
ARHGEF17	-6.64386	0
ARHGEF18	2.40871	0
ARHGEF19	2.76129	0
ARHGEF2	5.21994	0
ARHGEF25	3.31034	0
ARHGEF26	-4.64386	0
ARHGEF28	-7	0
ARHGEF3	-1.88897	0
ARHGEF33	-7	0
ARHGEF35	-2.94342	0
ARHGEF37	-7	0
ARHGEF38	-7	0
ARHGEF39	2.55582	0
ARHGEF4	-7	0
ARHGEF40	-0.136062	0
ARHGEF5	-5.05889	0
ARHGEF6	2.15704	0
ARHGEF7	3.45812	0
ARHGEF9	-7	0
ARID1A	4.63633	0
ARID1B	3.22342	0
ARID2	2.91265	0
ARID3A	4.86641	0
ARID3B	3.5435	0
ARID3C	-7	0
ARID4A	2.02503	0
ARID4B	3.27202	0
ARID5A	1.94111	0
ARID5B	-2.73697	0
ARIH1	4.42559	0
ARIH2	5.02192	0
ARIH2OS	0.85599	0
ARL1	4.60822	0
ARL10	-6.64386	0
ARL11	-1.8365	0
ARL13A	-3.47393	0
ARL13B	2.28096	0
ARL14	-7	0
ARL14EP	3.45418	0
ARL14EPL	-7	0
ARL15	4.97499	0
ARL16	3.50716	0
ARL17A	#N/A	0
ARL17B	#N/A	0
ARL2	6.32823	0
ARL2BP	4.49889	0
ARL3	1.58496	0
ARL4A	5.69905	0
ARL4C	-4.05889	0
ARL4D	-2.39593	0
ARL5A	5.75382	0
ARL5B	3.65535	0
ARL5C	-7	0
ARL6	-0.556393	0
ARL6IP1	7.02791	0
ARL6IP4	5.92006	0
ARL6IP5	3.40735	0
ARL6IP6	4.49761	0
ARL8A	3.33628	0
ARL8B	5.97957	0
ARL9	-7	0
ARMC1	5.05007	0
ARMC10	5.24755	0
ARMC12	-2.64386	0
ARMC2	-2.55639	0
ARMC3	-3.47393	0
ARMC4	-7	0
ARMC5	2.07382	0
ARMC6	4.73173	0
ARMC7	3.05485	0
ARMC8	3.41954	0
ARMC9	-1.59946	0
ARMCX1	-2.55639	0
ARMCX2	-6.64386	0
ARMCX3	3.47508	0
ARMCX4	-6.64386	0
ARMCX5	2.50843	0
ARMCX5-GPRASP2	#N/A	0
ARMCX6	2.98003	0
ARMS2	-7	0
ARMT1	#N/A	0
ARNT	4.16027	0
ARNT2	-7	0
ARNTL	-1.32193	0
ARNTL2	-3.18442	0
ARPC1A	6.07874	0
ARPC1B	7.0343	0
ARPC2	5.97934	0
ARPC3	7.99305	0
ARPC4	6.17572	0
ARPC4-TTLL3	4.09761	0
ARPC5	6.23496	0
ARPC5L	5.92932	0
ARPIN	#N/A	0
ARPP19	4.89627	0
ARPP21	-7	0
ARR3	-7	0
ARRB1	2.41684	0
ARRB2	2.7866	0
ARRDC1	3.58976	0
ARRDC2	3.36177	0
ARRDC3	4.76607	0
ARRDC4	3.83996	0
ARRDC5	-7	0
ARSA	1.22651	0
ARSB	0.124328	0
ARSD	-2.64386	0
ARSE	-6.64386	0
ARSF	-7	0
ARSG	-0.514573	0
ARSH	-7	0
ARSI	-7	0
ARSJ	-7	0
ARSK	0.992768	0
ART1	-7	0
ART3	-0.0291463	0
ART4	-3.8365	0
ART5	-1.78588	0
ARTN	-3.47393	0
ARV1	5.73904	0
ARVCF	4.21645	0
ARX	-6.64386	0
AS3MT	0.0703893	0
ASAH1	4.854	0
ASAH2	-0.666576	0
ASAH2B	3.0054	0
ASAP1	3.16027	0
ASAP2	1.07039	0
ASAP3	3.21568	0
ASB1	2.88362	0
ASB10	-7	0
ASB11	-2.55639	0
ASB12	-2.32193	0
ASB13	3.08576	0
ASB14	-2.64386	0
ASB15	-4.32193	0
ASB16	0.400538	0
ASB17	-7	0
ASB18	-7	0
ASB2	-7	0
ASB3	2.9222	0
ASB4	-7	0
ASB5	-7	0
ASB6	2.31904	0
ASB7	1.9782	0
ASB8	3.38543	0
ASB9	-0.862496	0
ASCC1	4.8125	0
ASCC2	4.32697	0
ASCC3	3.9607	0
ASCL1	-3.64386	0
ASCL2	-3.32193	0
ASCL3	-7	0
ASCL4	-7	0
ASCL5	-7	0
ASF1A	4.69599	0
ASF1B	5.7385	0
ASGR1	-3.8365	0
ASGR2	-7	0
ASH1L	2.45943	0
ASH2L	6.52607	0
ASIC1	-2.25154	0
ASIC2	-7	0
ASIC3	2.09424	0
ASIC4	2.76341	0
ASIC5	-7	0
ASIP	-7	0
ASL	4.54226	0
ASMT	-7	0
ASMTL	3.32769	0
ASNA1	5.10098	0
ASNS	8.38055	0
ASNSD1	3.78136	0
ASPA	-7	0
ASPDH	-7	0
ASPG	-7	0
ASPH	3.64386	0
ASPHD1	-5.05889	0
ASPHD2	-2.05889	0
ASPM	4.37365	0
ASPN	#N/A	0
ASPRV1	-0.736966	0
ASPSCR1	3.43429	0
ASRGL1	2.47249	0
ASS1	2.88947	0
ASTE1	1.33914	0
ASTL	-7	0
ASTN1	-3.05889	0
ASTN2	4.47249	0
ASUN	5.22997	0
ASXL1	4.4614	0
ASXL2	#N/A	0
ASXL3	-7	0
ASZ1	-4.64386	0
ATAD1	4.36177	0
ATAD2	5.38647	0
ATAD2B	2.70929	0
ATAD3A	6.0813	0
ATAD3B	4.56621	0
ATAD3C	-0.556393	0
ATAD5	4.05658	0
ATAT1	1.55582	0
ATCAY	-1.21759	0
ATE1	1.8679	0
ATF1	4.24489	0
ATF2	4.63807	0
ATF3	5.2075	0
ATF4	8.68271	0
ATF5	6.32643	0
ATF6	3.85997	0
ATF6B	5.43663	0
ATF7	3.83592	0
ATF7IP	3.17313	0
ATF7IP2	3.36597	0
ATG10	2.9782	0
ATG101	4.18428	0
ATG12	3.60999	0
ATG13	3.849	0
ATG14	1.58976	0
ATG16L1	2.43029	0
ATG16L2	0.83996	0
ATG2A	3.0993	0
ATG2B	2.37295	0
ATG3	5.11728	0
ATG4A	3.26604	0
ATG4B	3.75809	0
ATG4C	3.58616	0
ATG4D	4.10601	0
ATG5	4.39985	0
ATG7	2.88362	0
ATG9A	4.91791	0
ATG9B	#N/A	0
ATHL1	5.0063	0
ATIC	7.18903	0
ATL1	-2.55639	0
ATL2	4.87578	0
ATL3	4.38543	0
ATM	2.30451	0
ATMIN	3.05832	0
ATN1	4.80941	0
ATOH1	-7	0
ATOH7	-7	0
ATOH8	-7	0
ATOX1	6.04963	0
ATP10A	-7	0
ATP10B	-7	0
ATP10D	-4.64386	0
ATP11A	2.7866	0
ATP11AUN	-7	0
ATP11B	4.81198	0
ATP11C	3.55582	0
ATP12A	-7	0
ATP13A1	4.57894	0
ATP13A2	3.81455	0
ATP13A3	4.52168	0
ATP13A4	-6.64386	0
ATP13A5	-7	0
ATP1A1	8.10402	0
ATP1A2	-5.05889	0
ATP1A3	-2.39593	0
ATP1A4	-7	0
ATP1B1	1.12433	0
ATP1B2	2.56803	0
ATP1B3	6.92825	0
ATP1B4	-3.05889	0
ATP23	#N/A	0
ATP2A1	1.01436	0
ATP2A2	6.11832	0
ATP2A3	4.65191	0
ATP2B1	3.8166	0
ATP2B2	-7	0
ATP2B3	-6.64386	0
ATP2B4	3.31034	0
ATP2C1	4.46532	0
ATP2C2	-7	0
ATP4A	-5.05889	0
ATP4B	-7	0
ATP5A1	8.35332	0
ATP5B	9.9582	0
ATP5C1	8.09577	0
ATP5D	7.03221	0
ATP5E	9.93636	0
ATP5F1	7.81967	0
ATP5G1	7.26875	0
ATP5G2	8.76484	0
ATP5G3	7.92938	0
ATP5H	8.30811	0
ATP5I	8.64541	0
ATP5J	7.71438	0
ATP5J2	9.33771	0
ATP5J2-PTCD1	-2.55639	0
ATP5L	7.43471	0
ATP5L2	-7	0
ATP5O	9.24512	0
ATP5S	1.74846	0
ATP5SL	4.76871	0
ATP6AP1	5.98937	0
ATP6AP1L	1.25096	0
ATP6AP2	5.32265	0
ATP6V0A1	5.3505	0
ATP6V0A2	3.40871	0
ATP6V0A4	-7	0
ATP6V0B	7.16692	0
ATP6V0C	6.77992	0
ATP6V0D1	5.00585	0
ATP6V0D2	-6.64386	0
ATP6V0E1	5.76421	0
ATP6V0E2	3.19849	0
ATP6V1A	4.42156	0
ATP6V1B1	-7	0
ATP6V1B2	5.75729	0
ATP6V1C1	3.47897	0
ATP6V1C2	0.286881	0
ATP6V1D	4.30451	0
ATP6V1E1	6.84298	0
ATP6V1E2	1.14405	0
ATP6V1F	8.22713	0
ATP6V1G1	5.82248	0
ATP6V1G2	-1.73697	0
ATP6V1G3	-7	0
ATP6V1H	4.59515	0
ATP7A	3.0635	0
ATP7B	3.2032	0
ATP8A1	-4.64386	0
ATP8A2	-2.8365	0
ATP8B1	-5.64386	0
ATP8B2	3.61117	0
ATP8B3	1.1177	0
ATP8B4	-5.05889	0
ATP9A	-4.64386	0
ATP9B	1.1635	0
ATPAF1	4.14486	0
ATPAF2	2.38405	0
ATPIF1	8.10983	0
ATR	2.73769	0
ATRAID	5.83517	0
ATRIP	2.74201	0
ATRN	2.85798	0
ATRNL1	-7	0
ATRX	2.12102	0
ATXN1	-4.64386	0
ATXN10	4.48736	0
ATXN1L	2.09424	0
ATXN2	4.23266	0
ATXN2L	6.824	0
ATXN3	1.15704	0
ATXN3L	0.0976108	0
ATXN7	1.848	0
ATXN7L1	0.918386	0
ATXN7L2	1.81147	0
ATXN7L3	4.32193	0
ATXN7L3B	5.37921	0
AUH	2.13422	0
AUNIP	4.4489	0
AUP1	6.67652	0
AURKA	6.12019	0
AURKAIP1	7.19288	0
AURKB	6.15522	0
AURKC	2.60881	0
AUTS2	-7	0
AVEN	1.78241	0
AVIL	-2.8365	0
AVL9	4.43296	0
AVP	-7	0
AVPI1	2.08406	0
AVPR1A	-3.64386	0
AVPR1B	-7	0
AVPR2	-3.47393	0
AWAT1	-7	0
AWAT2	-7	0
AXDND1	-5.05889	0
AXIN1	4.36807	0
AXIN2	0.0426443	0
AXL	-1.18442	0
AZGP1	-7	0
AZI2	4.66107	0
AZIN1	5.24793	0
AZIN2	-4.64386	0
AZU1	-0.0144996	0
B2M	8.78992	0
B3GALNT1	-0.666576	0
B3GALNT2	3.06867	0
B3GALT1	2.14405	0
B3GALT2	-5.05889	0
B3GALT4	-1.64386	0
B3GALT5	-7	0
B3GALT6	2.78241	0
B3GAT1	-2.32193	0
B3GAT2	-7	0
B3GAT3	4.63807	0
B3GLCT	#N/A	0
B3GNT2	3.79494	0
B3GNT3	-5.64386	0
B3GNT4	0.584963	0
B3GNT5	3.75596	0
B3GNT6	-2.64386	0
B3GNT7	-2.32193	0
B3GNT8	-1.2863	0
B3GNT9	-0.621488	0
B3GNTL1	3.05311	0
B4GALNT1	2.83794	0
B4GALNT2	-7	0
B4GALNT3	-6.64386	0
B4GALNT4	3.46336	0
B4GALT1	3.74308	0
B4GALT2	5.06393	0
B4GALT3	4.98413	0
B4GALT4	2.70708	0
B4GALT5	3.82985	0
B4GALT6	-1.8365	0
B4GALT7	2.80529	0
B4GAT1	2.42223	0
B9D1	3.08746	0
B9D2	1.88362	0
BAALC	-7	0
BAAT	-4.64386	0
BABAM1	5.72438	0
BACE1	0.400538	0
BACE2	-4.32193	0
BACH1	4.39094	0
BACH2	-1.55639	0
BAD	3.19219	0
BAG1	3.49185	0
BAG2	5.28614	0
BAG3	3.854	0
BAG4	3.78346	0
BAG5	3.05485	0
BAG6	7.04876	0
BAGE2	#N/A	0
BAHCC1	#N/A	0
BAHD1	3.86096	0
BAIAP2	3.45549	0
BAIAP2L1	3.55582	0
BAIAP2L2	-3.32193	0
BAIAP3	-0.104697	0
BAK1	3.65191	0
BAMBI	3.81352	0
BANF1	7.1636	0
BANF2	-7	0
BANK1	-7	0
BANP	2.71589	0
BAP1	4.43429	0
BARD1	2.15056	0
BARHL1	-7	0
BARHL2	-4.32193	0
BARX1	-7	0
BARX2	-7	0
BASP1	-7	0
BATF	-2.8365	0
BATF2	2.18587	0
BATF3	-0.810966	0
BAX	5.67694	0
BAZ1A	3.98368	0
BAZ1B	5.77373	0
BAZ2A	4.8268	0
BAZ2B	1.0635	0
BBC3	3.78764	0
BBIP1	1.91073	0
BBOF1	#N/A	0
BBOX1	-7	0
BBS1	1.46467	0
BBS10	2.56316	0
BBS12	1.26903	0
BBS2	2.15056	0
BBS4	4.28688	0
BBS5	4.66846	0
BBS7	2.67129	0
BBS9	-0.943416	0
BBX	2.28096	0
BCAM	-1.47393	0
BCAN	0.978196	0
BCAP29	4.23879	0
BCAP31	7.36615	0
BCAR1	2.67129	0
BCAR3	-0.152003	0
BCAS1	-0.136062	0
BCAS2	5.5373	0
BCAS3	1.17632	0
BCAS4	-2	0
BCAT1	5.98732	0
BCAT2	5.18388	0
BCCIP	6.3906	0
BCDIN3D	1.12433	0
BCHE	-5.64386	0
BCKDHA	4.45418	0
BCKDHB	2.34767	0
BCKDK	4.29499	0
BCL10	2.70044	0
BCL11A	-7	0
BCL11B	-7	0
BCL2	-1.39593	0
BCL2A1	-5.05889	0
BCL2L1	6.39763	0
BCL2L10	-7	0
BCL2L11	2.76341	0
BCL2L12	5.49185	0
BCL2L13	4.62234	0
BCL2L14	-7	0
BCL2L15	-2.94342	0
BCL2L2	3.82171	0
BCL2L2-PABPN1	#N/A	0
BCL3	-0.358454	0
BCL6	1.87184	0
BCL6B	1.02857	0
BCL7A	3.34341	0
BCL7B	4.83693	0
BCL7C	4.41954	0
BCL9	0.565597	0
BCL9L	1.48027	0
BCLAF1	5.35332	0
BCO1	-7	0
BCO2	-2.8365	0
BCOR	5.41481	0
BCORL1	2.89142	0
BCR	4.29278	0
BCS1L	4.48091	0
BDH1	-6.64386	0
BDH2	0.389567	0
BDKRB1	-3.64386	0
BDKRB2	-7	0
BDP1	2.75916	0
BEAN1	-7	0
BECN1	4.39438	0
BECN2	#N/A	0
BEGAIN	-2.47393	0
BEND2	-3.8365	0
BEND3	0.298658	0
BEND4	-7	0
BEND5	-7	0
BEND6	-1.25154	0
BEND7	1.77821	0
BEST1	-1.02915	0
BEST2	-6.64386	0
BEST3	-5.64386	0
BEST4	-6.64386	0
BET1	3.99095	0
BET1L	5.25588	0
BEX1	-7	0
BEX2	3.12267	0
BEX3	#N/A	0
BEX4	7.00865	0
BEX5	-0.556393	0
BFAR	4.40667	0
BFSP1	-2.64386	0
BFSP2	-7	0
BGLAP	-2.94342	0
BGN	-7	0
BHLHA15	-2.55639	0
BHLHA9	-7	0
BHLHB9	0.15056	0
BHLHE22	-7	0
BHLHE23	-7	0
BHLHE40	6.29682	0
BHLHE41	-7	0
BHMT	-7	0
BHMT2	-1	0
BICC1	-7	0
BICD1	0.422233	0
BICD2	3.2555	0
BID	4.35544	0
BIK	-3.18442	0
BIN1	0.238787	0
BIN2	-2.73697	0
BIN3	3.62644	0
BIRC2	4.26529	0
BIRC3	-1.8365	0
BIRC5	5.79597	0
BIRC6	3.37295	0
BIRC7	-3.64386	0
BIRC8	-7	0
BIVM	3.26454	0
BIVM-ERCC5	#N/A	0
BLCAP	4.01614	0
BLID	-7	0
BLK	-7	0
BLM	4.32769	0
BLMH	5.98891	0
BLNK	-7	0
BLOC1S1	5.88166	0
BLOC1S2	3.17313	0
BLOC1S3	2.42761	0
BLOC1S4	3.85499	0
BLOC1S5	4.08576	0
BLOC1S6	4.82731	0
BLVRA	5.30561	0
BLVRB	8.8241	0
BLZF1	3.16511	0
BMF	-0.340075	0
BMI1	4.8166	0
BMP1	2.97636	0
BMP10	-2.32193	0
BMP15	-7	0
BMP2	-5.05889	0
BMP2K	4.94579	0
BMP3	-5.05889	0
BMP4	-6.64386	0
BMP5	-7	0
BMP6	-6.64386	0
BMP7	0.163499	0
BMP8A	-2.47393	0
BMP8B	-3.47393	0
BMPER	-7	0
BMPR1A	2.33342	0
BMPR1B	-7	0
BMPR2	0.565597	0
BMS1	4.35191	0
BMX	1.69599	0
BNC1	-7	0
BNC2	-7	0
BNIP1	3.82985	0
BNIP2	4.44956	0
BNIP3	7.49113	0
BNIP3L	5.63169	0
BNIPL	-0.358454	0
BOC	-7	0
BOD1	3.21412	0
BOD1L1	2.49057	0
BOD1L2	-7	0
BOK	-1.32193	0
BOLA1	-2.64386	0
BOLA2	#N/A	0
BOLA2B	4.47314	0
BOLA3	7.19633	0
BOLL	-5.05889	0
BOP1	6.17253	0
BORA	3.1375	0
BORCS5	#N/A	0
BORCS6	#N/A	0
BORCS7	#N/A	0
BORCS8	#N/A	0
BPGM	3.73227	0
BPHL	1.67356	0
BPI	-7	0
BPIFA1	-7	0
BPIFA2	-7	0
BPIFA3	-7	0
BPIFB1	-7	0
BPIFB2	-7	0
BPIFB3	-7	0
BPIFB4	-7	0
BPIFB6	-7	0
BPIFC	-7	0
BPNT1	4.91265	0
BPTF	3.44493	0
BPY2	#N/A	0
BPY2B	#N/A	0
BPY2C	#N/A	0
BRAF	3.21878	0
BRAP	3.72792	0
BRAT1	4.23189	0
BRCA1	4.51602	0
BRCA2	1.36177	0
BRCC3	3.36036	0
BRD1	2.61117	0
BRD2	6.07296	0
BRD3	3.58256	0
BRD4	4.79181	0
BRD7	5.59604	0
BRD8	5.28577	0
BRD9	4.45812	0
BRDT	-4.64386	0
BRE	4.09001	0
BRF1	2.88362	0
BRF2	3.79286	0
BRI3	4.78816	0
BRI3BP	3.43029	0
BRICD5	0.918386	0
BRINP1	-7	0
BRINP2	-7	0
BRINP3	0.485427	0
BRIP1	2.42761	0
BRIX1	6.72928	0
BRK1	7.45105	0
BRMS1	4.59395	0
BRMS1L	0.871844	0
BROX	4.34908	0
BRPF1	3.65878	0
BRPF3	2.84599	0
BRS3	-7	0
BRSK1	0.782409	0
BRSK2	-5.05889	0
BRWD1	4.21335	0
BRWD3	1.67356	0
BSCL2	4.54102	0
BSDC1	5.58195	0
BSG	8.02851	0
BSN	-1.47393	0
BSND	-7	0
BSPH1	-7	0
BSPRY	-2.12029	0
BST1	-3.8365	0
BST2	6.78725	0
BSX	-7	0
BTAF1	3.83289	0
BTBD1	5.71315	0
BTBD10	2.58496	0
BTBD11	-7	0
BTBD16	-7	0
BTBD17	-7	0
BTBD18	-4.64386	0
BTBD19	#N/A	0
BTBD2	3.83491	0
BTBD3	1.87184	0
BTBD6	-3.8365	0
BTBD7	1.54102	0
BTBD8	-0.599462	0
BTBD9	-1.94342	0
BTC	-7	0
BTD	2.37851	0
BTF3	9.65059	0
BTF3L4	4.55582	0
BTG1	3.68032	0
BTG2	4.19535	0
BTG3	4.0365	0
BTG4	-7	0
BTK	5.51633	0
BTLA	-5.64386	0
BTN1A1	-5.64386	0
BTN2A1	2.76765	0
BTN2A2	1.23266	0
BTN3A1	1.3505	0
BTN3A2	1.45418	0
BTN3A3	-0.888969	0
BTNL10	#N/A	0
BTNL2	#N/A	0
BTNL3	-3.05889	0
BTNL8	-4.05889	0
BTNL9	3.72901	0
BTRC	2.1177	0
BUB1	7.04811	0
BUB1B	5.51759	0
BUB3	6.68524	0
BUD13	3.99729	0
BUD31	6.83479	0
BVES	-2.64386	0
BYSL	5.22149	0
BZW1	6.04592	0
BZW2	7.13843	0
C10orf10	-1.59946	0
C10orf105	-5.64386	0
C10orf107	-7	0
C10orf111	-3.32193	0
C10orf113	-4.32193	0
C10orf12	1.48027	0
C10orf120	-7	0
C10orf126	-7	0
C10orf128	3.66448	0
C10orf131	-4.64386	0
C10orf142	#N/A	0
C10orf2	3.39232	0
C10orf25	-2.12029	0
C10orf35	2.75702	0
C10orf53	-7	0
C10orf54	0.201634	0
C10orf55	-4.64386	0
C10orf62	-7	0
C10orf67	-7	0
C10orf71	0.941106	0
C10orf76	-5.05889	0
C10orf82	-7	0
C10orf88	2.39506	0
C10orf90	-7	0
C10orf91	-3.05889	0
C10orf95	1.48543	0
C10orf99	-7	0
C11orf1	4.0018	0
C11orf16	-5.05889	0
C11orf21	0.454176	0
C11orf24	4.16591	0
C11orf31	5.81019	0
C11orf40	-7	0
C11orf42	-3.47393	0
C11orf44	-7	0
C11orf45	-6.64386	0
C11orf49	2.78869	0
C11orf52	-1.12029	0
C11orf53	-7	0
C11orf54	3.66221	0
C11orf57	4.19298	0
C11orf58	5.70764	0
C11orf63	-3.32193	0
C11orf65	-0.971431	0
C11orf68	4.55704	0
C11orf70	-3.05889	0
C11orf71	2.3978	0
C11orf73	4.98823	0
C11orf74	3.89142	0
C11orf80	1.89918	0
C11orf84	4.08576	0
C11orf85	-5.05889	0
C11orf86	-7	0
C11orf87	-7	0
C11orf88	-7	0
C11orf91	-7	0
C11orf94	-3.05889	0
C11orf95	#N/A	0
C11orf96	#N/A	0
C11orf97	#N/A	0
C11orf98	#N/A	0
C12orf10	0.344828	0
C12orf29	3.86987	0
C12orf4	2.06005	0
C12orf40	1.18269	0
C12orf42	-7	0
C12orf43	2.30743	0
C12orf45	4.65535	0
C12orf49	2.52105	0
C12orf50	-7	0
C12orf54	-7	0
C12orf56	-2.18442	0
C12orf57	6.11207	0
C12orf60	0.584963	0
C12orf65	4.48993	0
C12orf66	1.32769	0
C12orf71	-2.55639	0
C12orf73	3.29572	0
C12orf74	-7	0
C12orf75	-1.4344	0
C12orf76	3.64731	0
C12orf77	-7	0
C12orf80	#N/A	0
C14orf1	4.37086	0
C14orf105	-5.64386	0
C14orf119	3.73335	0
C14orf132	#N/A	0
C14orf142	3.00899	0
C14orf159	2.84398	0
C14orf166	6.75916	0
C14orf169	#N/A	0
C14orf177	-7	0
C14orf178	-7	0
C14orf180	-6.64386	0
C14orf2	7.36842	0
C14orf28	-1.64386	0
C14orf37	-5.05889	0
C14orf39	-2.12029	0
C14orf79	-0.0439433	0
C14orf80	2.60407	0
C14orf93	3.14241	0
C15orf32	-7	0
C15orf38-AP3S2	-7	0
C15orf39	2.84599	0
C15orf40	3.24489	0
C15orf41	3.26303	0
C15orf43	-7	0
C15orf48	-7	0
C15orf52	-2.94342	0
C15orf53	-7	0
C15orf54	-7	0
C15orf56	-7	0
C15orf57	4.2765	0
C15orf59	-7	0
C15orf61	3.17951	0
C15orf62	-0.0740006	0
C15orf65	0.650765	0
C16orf13	5.69516	0
C16orf45	-0.184425	0
C16orf46	-0.621488	0
C16orf47	#N/A	0
C16orf52	1.29866	0
C16orf54	-7	0
C16orf58	5.13668	0
C16orf59	4.08321	0
C16orf62	3.29278	0
C16orf70	2.99458	0
C16orf71	-6.64386	0
C16orf72	4.65249	0
C16orf74	-7	0
C16orf78	-7	0
C16orf82	#N/A	0
C16orf86	-2.32193	0
C16orf87	3.09592	0
C16orf89	-5.05889	0
C16orf90	-7	0
C16orf91	4.12516	0
C16orf92	-7	0
C16orf95	2.9855	0
C16orf96	-6.64386	0
C16orf97	-7	0
C17orf100	#N/A	0
C17orf102	-7	0
C17orf105	-7	0
C17orf107	-4.05889	0
C17orf112	-7	0
C17orf47	-7	0
C17orf49	4.88215	0
C17orf50	-7	0
C17orf51	-0.200913	0
C17orf53	3.50462	0
C17orf58	3.61706	0
C17orf62	4.71589	0
C17orf64	-7	0
C17orf67	-1.2863	0
C17orf74	-6.64386	0
C17orf75	2.56803	0
C17orf77	-7	0
C17orf78	-6.64386	0
C17orf80	3.42492	0
C17orf82	-7	0
C17orf89	4.93216	0
C17orf96	1.89142	0
C17orf97	-7	0
C17orf98	-7	0
C17orf99	4.13586	0
C18orf21	4.48091	0
C18orf25	2.76977	0
C18orf32	3.73118	0
C18orf54	2.20477	0
C18orf63	-7	0
C18orf65	#N/A	0
C18orf8	4.07895	0
C19orf12	1.4957	0
C19orf18	-7	0
C19orf24	4.79805	0
C19orf25	3.52732	0
C19orf33	-7	0
C19orf35	-1.55639	0
C19orf38	-3.32193	0
C19orf43	6.32499	0
C19orf44	1.01436	0
C19orf45	-7	0
C19orf47	3.0018	0
C19orf48	6.67765	0
C19orf52	3.53854	0
C19orf53	5.90641	0
C19orf54	3.7148	0
C19orf57	1.19535	0
C19orf60	4.02503	0
C19orf66	2.21723	0
C19orf67	-0.810966	0
C19orf68	#N/A	0
C19orf70	5.47606	0
C19orf71	0.263034	0
C19orf73	0.632268	0
C19orf81	2.03914	0
C19orf84	1.18269	0
C1D	5.0148	0
C1GALT1	3.31034	0
C1GALT1C1	2.85599	0
C1GALT1C1L	#N/A	0
C1orf100	1.1177	0
C1orf101	-5.05889	0
C1orf105	-7	0
C1orf106	-5.64386	0
C1orf109	4.35262	0
C1orf111	-3.47393	0
C1orf112	4.02768	0
C1orf115	-7	0
C1orf116	0.584963	0
C1orf122	3.40463	0
C1orf123	5.22959	0
C1orf127	-7	0
C1orf131	4.22728	0
C1orf137	-7	0
C1orf141	-5.05889	0
C1orf146	-4.64386	0
C1orf158	-7	0
C1orf159	3.75702	0
C1orf162	0.536053	0
C1orf167	#N/A	0
C1orf168	-6.64386	0
C1orf174	5.12805	0
C1orf185	-7	0
C1orf186	-7	0
C1orf189	-4.64386	0
C1orf194	-7	0
C1orf195	-7	0
C1orf198	3.0321	0
C1orf204	-6.64386	0
C1orf21	-6.64386	0
C1orf210	-2.94342	0
C1orf216	3.24184	0
C1orf226	0.163499	0
C1orf228	-7	0
C1orf229	-0.785875	0
C1orf233	1.97085	0
C1orf234	-7	0
C1orf27	3.8953	0
C1orf43	6.92588	0
C1orf50	3.44758	0
C1orf52	2.76129	0
C1orf53	-1.05889	0
C1orf54	-1.64386	0
C1orf56	0.516015	0
C1orf61	-2.64386	0
C1orf64	-7	0
C1orf68	-7	0
C1orf87	-7	0
C1orf94	-7	0
C1orf95	-7	0
C1QA	-7	0
C1QB	-7	0
C1QBP	7.73559	0
C1QC	-7	0
C1QL1	-5.64386	0
C1QL2	-7	0
C1QL3	-2.47393	0
C1QL4	-0.943416	0
C1QTNF1	-7	0
C1QTNF2	-6.64386	0
C1QTNF3	-1.64386	0
C1QTNF4	-7	0
C1QTNF5	-1.94342	0
C1QTNF6	-1.88897	0
C1QTNF7	-6.64386	0
C1QTNF8	-7	0
C1QTNF9	-7	0
C1QTNF9B	-4.05889	0
C1QTNF9B-AS1	#N/A	0
C1RL	1.66448	0
C1S	-3.47393	0
C2	-1.8365	0
C20orf141	-7	0
C20orf144	-2.55639	0
C20orf173	-7	0
C20orf194	0.344828	0
C20orf195	-2.25154	0
C20orf196	1.81558	0
C20orf197	-7	0
C20orf202	-2.8365	0
C20orf203	#N/A	0
C20orf24	5.91839	0
C20orf27	5.36247	0
C20orf78	-7	0
[truncated: 18,115 more rows]

## Sheet: SLC25
Annotated.Gene.Symbol	K562_rnaseq_FPKM_log2
SLC25A1	7.64458	1
SLC25A2	-5.64386	1
SLC25A3	8.67186	1
SLC25A4	3.15866	1
SLC25A5	9.21847	1
SLC25A6	8.31908	1
UCP1	-7	1
UCP2	6.49586	1
UCP3	-2.47393	1
SLC25A10	4.9472	1
SLC25A11	4.51728	1
SLC25A12	3.23879	1
SLC25A13	5.19259	1
SLC25A14	2.3505	1
SLC25A15	3.69377	1
SLC25A16	2.88166	1
SLC25A17	5.15947	1
SLC25A18	-3.32193	1
SLC25A19	4.2211	1
SLC25A20	3.74739	1
SLC25A21	4.10685	1
SLC25A22	3.89627	1
SLC25A23	5.36982	1
SLC25A24	4.36527	1
SLC25A25	4.30889	1
SLC25A26	2.22033	1
SLC25A27	-5.64386	1
SLC25A28	2.848	1
SLC25A29	1.57046	1
SLC25A30	1.84398	1
SLC25A31	-7	1
SLC25A32	3.76553	1
SLC25A33	4.84046	1
SLC25A34	-1.88897	1
SLC25A35	0.782409	1
SLC25A36	4.66221	1
SLC25A37	6.87664	1
SLC25A38	4.96809	1
SLC25A39	7.2666	1
SLC25A40	4.42761	1
SLC25A41	1.14405	1
SLC25A42	4.08151	1
SLC25A43	1.52607	1
SLC25A44	2.69599	1
SLC25A45	-0.761213	1
SLC25A46	4.24717	1
SLC25A47	-7	1
SLC25A48	-7	1
MTCH1	6.48543	1
MTCH2	6.00405	1
SLC25A51	3.02326	1
SLC25A52	-3.18442	1
SLC25A53	-6.64386	1
